# Supplementary material for: Components of gating charge movement and S4 voltage-sensor exposure during activation of hERG channels
Source: PubMed Central journal article supplement — J Gen Physiol. 2013 Apr;141(4):431–43. doi: 10.1085/jgp.201210942 (PMC3607828; doi:10.1085/jgp.201210942), 2013-04
Supplement: supp_jgp.201210942_JGP_201210942_sm.pdf [file supp_jgp.201210942_JGP_201210942_sm.pdf]

Wang et al., <http://www.jgp.org/cgi/content/full/jgp.201210942/DC1>

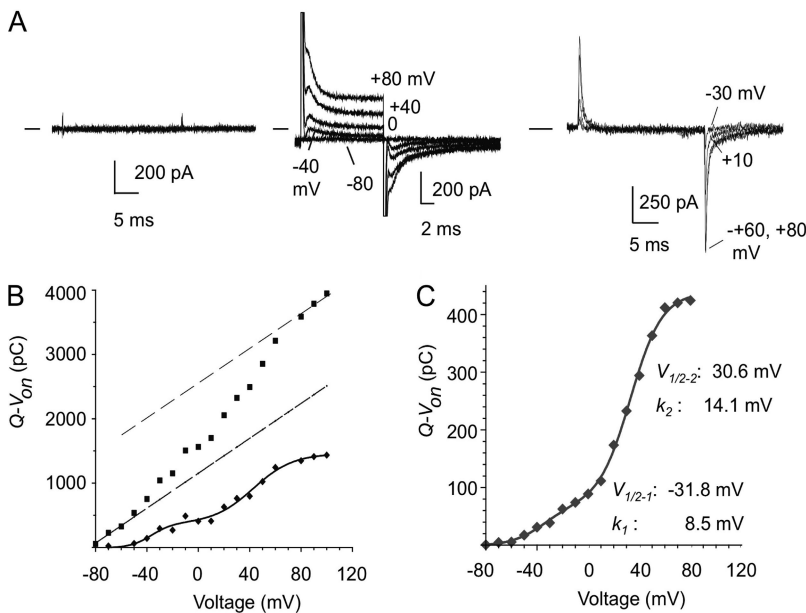

**Figure S1.** Gating currents recorded from hERG channels expressed in mammalian cells. (A; left) Representative traces showing that no current could be recorded from untransfected tsA201 cells using symmetrical 140 mM NMDG<sup>+</sup> solutions. (Middle) Family of gating currents for a series of pulses from -80 to +80 mV in steps of 10 mV from a holding potential of -80 mV and repolarized back to -80 mV. Neither leak subtraction nor capacitance compensation was used. (Right) Representative gating currents evoked using the same protocol as in the middle panel, except that membrane was repolarized back to -100 mV after leak-current subtraction (P/6) and membrane capacitance compensation. (B) Repolarization-induced currents with uncompensated capacitance (A, middle) were integrated over time and plotted as a function of depolarizing pulse potential. The linear components (dashed lines) represent the linear capacitance of the cell and electrode voltage-clamp system. The nonlinear component, which is related to gating charge movement, was subtracted from the bottom linear regression and fit with a

double Boltzmann function ( $V_{1/2-1} = -36.6$  mV,  $k_1 = 8.3$  mV,  $V_{1/2-2} = 42.8$  mV,  $k_2 = 15.5$  mV, and  $r^2 = 0.99$ ). (C)  $Q-V$  plot of repolarization-induced currents ( $Q-V_{off}$ ), using the same protocol as in A (right). The curve was fitted with a double Boltzmann function ( $V_{1/2-1} = -31.8$  mV,  $k_1 = 8.5$  mV,  $V_{1/2-2} = 30.6$  mV,  $k_2 = 14.1$  mV, and  $r^2 = 0.998$ ).
